# Supplementary material for: Surveillance of WHO Priority Gram-Negative Pathogenic Bacteria in Effluents from Two Seafood Processing Facilities in Tema, Ghana, 2021 and 2022: A Descriptive Study
Source: MDPI journal article supplement (doi:10.3390/ijerph191710823), 2022-08-30
Supplement: s1 [file s1]

## Supplementary Data

**Table S1.** Physical characteristics of effluent samples in two seafood processing facilities (SPF) in Tema, Ghana during 2021 and 2022

| Date of sample collection | pH    |       | Temperature (°C) |       |
|---------------------------|-------|-------|------------------|-------|
|                           | SPF-1 | SPF-2 | SPF-1            | SPF-2 |
| 04-05-2021                | 5.78  | 6.02  | 25.3             | 25.5  |
| 11-05-2021                | 5.61  | 5.92  | 25.9             | 25.6  |
| 18-05-2021                | 5.94  | 6.04  | 26.2             | 26.0  |
| 24-05-2021                | 6.01  | 5.93  | 26.8             | 27.0  |
| 01-06-2021                | 5.84  | 6.04  | 26.3             | 26.1  |
| 08-06-2021                | 6.12  | 6.08  | 25.4             | 25.1  |
| 15-06-2021                | 6.43  | 6.12  | 25.1             | 25.4  |
| 29-06-2021                | 6.08  | 6.44  | 25.6             | 25.9  |
| 01-07-2021                | 5.95  | 6.32  | 26.2             | 26.5  |
| 06-07-2021                | 5.66  | 5.87  | 27.1             | 27.4  |
| 13-07-2021                | 5.59  | 6.09  | 27.9             | 28.2  |
| 20-07-2021                | 5.14  | -     | 26.9             | -     |
| 27-07-2021                | 5.57  | 6.32  | 27.4             | 27.9  |
| 09-03-2022                | 5.71  | 5.83  | 28.1             | 27.7  |
| 15-03-2022                | 5.18  | 5.79  | 27.9             | 27.5  |
| 22-03-2022                | 5.38  | 5.84  | 28.1             | 27.8  |
| 12-04-2022                | 5.65  | 5.91  | 27.6             | 27.4  |
| 19-04-2022                | 5.17  | 5.82  | 27.9             | 27.7  |
| 26-04-2022                | 5.39  | 6.08  | 27.0             | 26.8  |
| 10-05-2022                | -     | 6.14  | -                | 26.1  |
| - No sample               |       |       |                  |       |

**Table S2.** Mean values of pH and temperature from the effluent samples collected from the two seafood processing facilities (SPF) in Tema, Ghana during 2021 and 2022.

| Parameter       | Mean  | SD   | Min  | Max  | Mann Whitney U test | p-value |
|-----------------|-------|------|------|------|---------------------|---------|
| pH              | 5.86  | 0.32 | 5.14 | 6.44 | 72                  | 0.00161 |
| Temperature(°C) | 26.74 | 0.98 | 25.1 | 28.2 | 190.5               | 0.7812  |

The Mann Whitney U test was used to test for significant difference in pH and temperature of samples from SPF-1 and SPF-2.

The test statistic from the analysis revealed statistically significant difference in pH level between SPF-1 and SPF-2 (p-value = 0.0012). On the contrary, the analysis revealed no statistically significant difference in temperature levels between both sites (p-value = 0.7812).
